# Supplementary material for: Facile one-step radio frequency magnetron sputtering of Ni/NiO on stainless steel for an efficient electrode for hydrogen evolution reaction
Source: publisher site journal article supplement (doi:10.3762/bjnano.16.63), 2025-06-06
Supplement: Additional file 1 [file 2190-4286-16-63-S1.pdf]

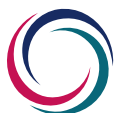

## Supporting Information

for

### **Facile one-step radio frequency magnetron sputtering of Ni/NiO on stainless steel for an efficient electrode for hydrogen evolution reaction**

Ha Huu Do, Khac Binh Nguyen, Phuong N. Nguyen and Hoai Phuong Pham

*Beilstein J. Nanotechnol.* **2025**, *16*, 837–846. doi:10.3762/bjnano.16.63

**XRD and HER performance of Ni/SS; EDX spectra of various Ni/NiO/SS electrodes; CV curves in non-faradaic zone of electrodes at various scan rates (20–120 mV·s<sup>-1</sup>) in 1.0 M KOH**

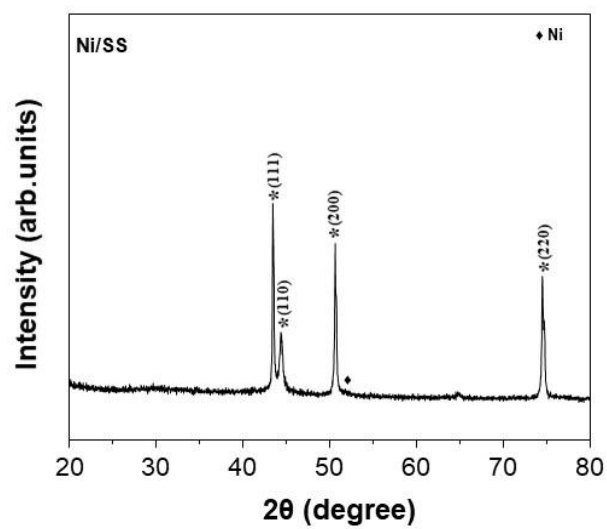

**Figure S1:** XRD data of Ni/SS.

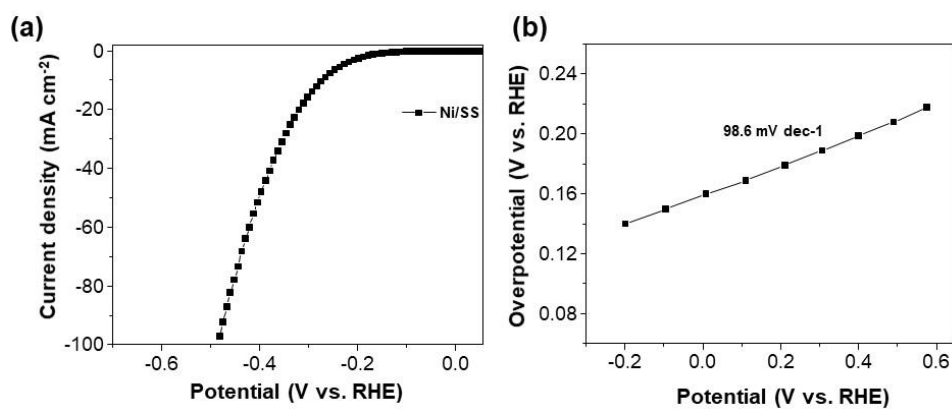

**Figure S2:** (a) Polarization curve of Ni/SS electrode, (b) corresponding Tafel slope of Ni/SS electrode.

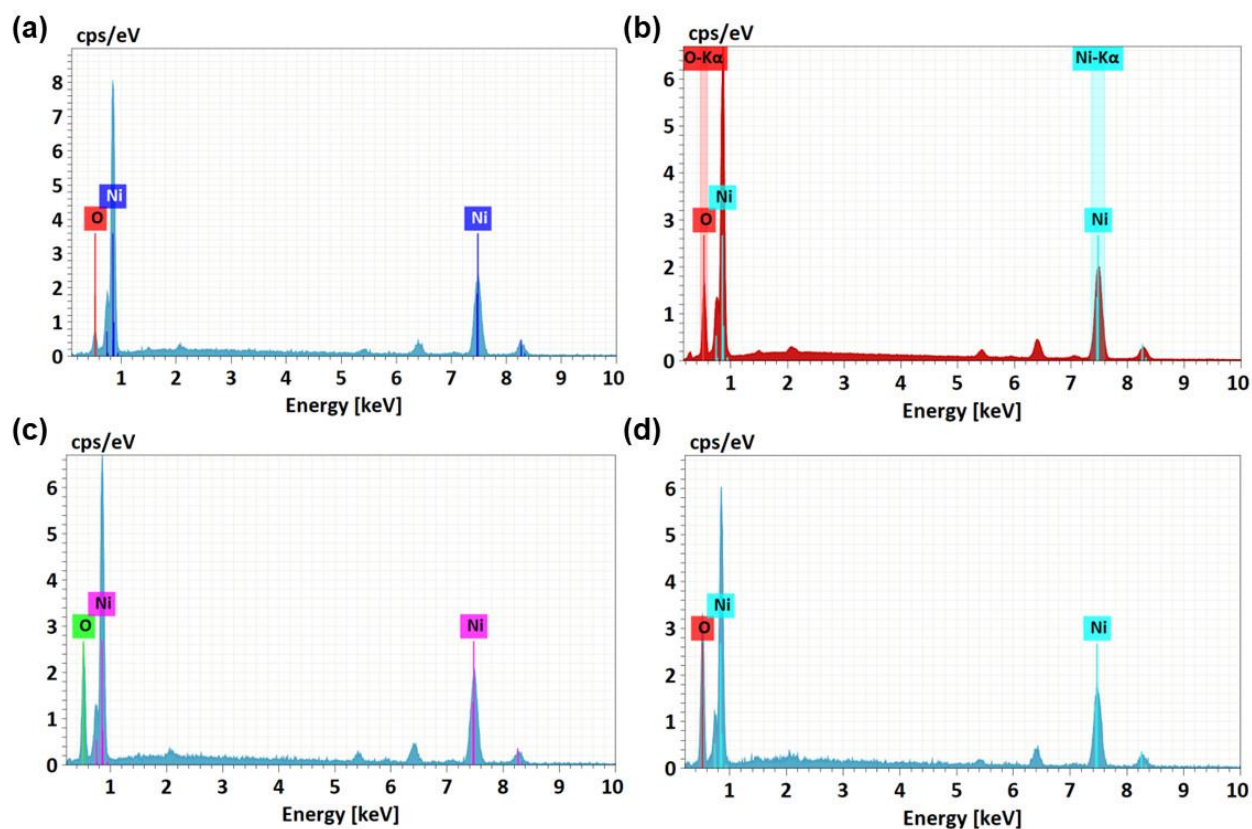

**Figure S3:** EDX spectra of (a) Ni/NiO/SS-5, (b) Ni/NiO/SS-10, (c) Ni/NiO/SS-15, (d) Ni/NiO/SS-20.

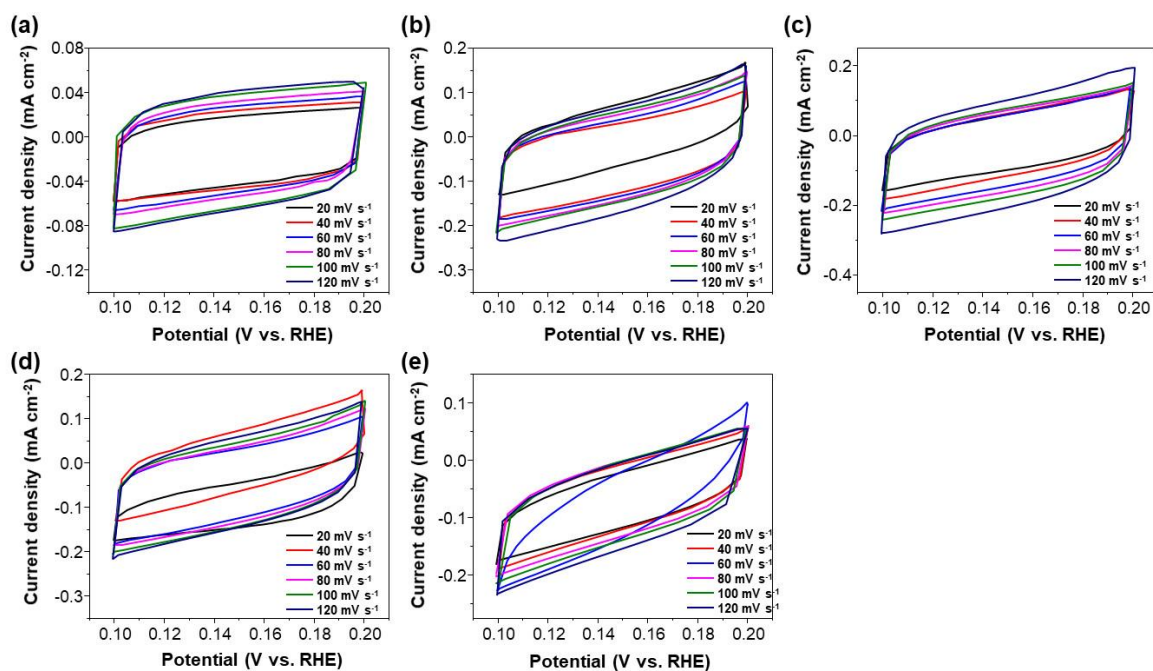

**Figure S4:** CV curves in non-faradaic zone of SS, Ni/NiO/SS-5, Ni/NiO/SS-10, Ni/NiO/SS-15, Ni/NiO/SS-20 at various scan rates (20–120 mV/s) in 1.0 M KOH.

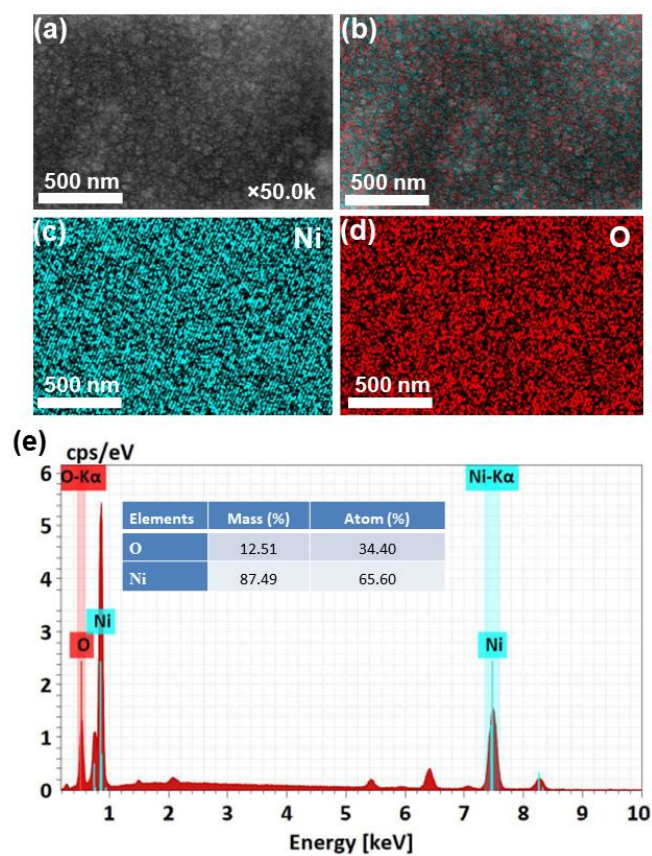

**Figure S5:** (a) SEM image, (b) Overall mapping elements corresponding to (c) nickel, (d) oxygen, (e) EDX analysis of Ni/NiO/SS-10 electrode after stability test.

## Calculation of TOF

The number ( $N_{Ni}$ ) of surface-active sites per  $cm^2$  is calculated based on Eqs (S1) and (S2):

$$N_{Ni} = n_{Ni} \times N_A \quad (S1)$$

$$N_{Ni} = \frac{m(film) \text{ mg} \times Wt.\%Ni}{58.693 \times 10^3 \text{ mg mol}^{-1}} \times 6.022 \times 10^{23} \frac{1}{mol} \quad (S2)$$

Wt.% is the weight percent of Ni in the sample.

The number of total hydrogen is calculated from the current density using Eqs (S3)

$$\left(j \frac{mA}{cm^2}\right) \left(\frac{1 A}{1000 mA}\right) \left(\frac{1 C/s}{1 A}\right) \left(\frac{1 mol e^-}{96485.3 C}\right) \left(\frac{1 mol H_2}{2 mol e^-}\right) \times$$

$$\left(\frac{6.022 \times 10^{23} \text{ molecules } H_2}{1 mol H_2}\right) = 3.12 \times 10^{15} \frac{H_2/s}{cm^2} \text{ per } \frac{mA}{cm^2} \quad (S3)$$

Here  $j$ : ( $mA \cdot cm^{-2}$ ) is the current density at an overpotential of 200 mV in 1.0 M KOH; therefore, the

TOF per site is calculated as Eqs (S4).

$$\frac{\left(3.12 \times 10^{15} \frac{H_2/s}{cm^2} \text{ per } \frac{mA}{cm^2}\right) \left(j \frac{mA}{cm^2}\right)}{(N_{Ni})} = \left(3.12 \times 10^{15} \times \frac{j}{N_{Ni}}\right) \frac{H_2/s}{surface} \quad (S4)$$
